# Supplementary material for: Tubular polyoxoanion [(SeMo6O21)2(C2O4)3]10− and its transformations
Source: Royal Society of Chemistry journal article supplement (doi:10.1039/d1nj00421b), 2021-01-01
Supplement: d1nj00421b1.pdf [file d1nj00421b1.pdf]

## Tubular polyoxoanion $[(\text{SeMo}_6\text{O}_{21})_2(\text{C}_2\text{O}_4)_3]^{10-}$ and its transformations

Valeria S. Pantyukhina<sup>a,b</sup>, Victoria V. Volchek<sup>a</sup>, Vladislav Yu. Komarov<sup>a</sup>, Ilia Korolkov<sup>a</sup>, Vasili V. Kokovkin<sup>a</sup>, Nikolay B. Kompankov<sup>a</sup>, Pavel A. Abramov<sup>\*a,c</sup>, Maxim N. Sokolov<sup>a</sup>

## Supporting information

### Table of contents

|                                                                                                                                 |    |
|---------------------------------------------------------------------------------------------------------------------------------|----|
| <b>Table S1.</b> Experimental details .....                                                                                     | 2  |
| <b>Table S2.</b> Selected geometric parameters (Å) .....                                                                        | 4  |
| <b>Fig. S1.</b> The infinite tubular structures along [10-1] crystal direction in the crystal structure of <b>Mo6Se-1</b> ..... | 8  |
| <b>Fig. S2.</b> Comparison of experimental and calculated powder patterns for <b>Mo6Se-1</b> . .....                            | 9  |
| <b>Fig. S3.</b> XRPD patterns comparison for <b>Mo6Se-2</b> . .....                                                             | 10 |
| <b>Fig. S4.</b> XRPD patterns comparison for <b>Mo6Se-2</b> after MeOH washing. ....                                            | 10 |
| <b>Fig. S5.</b> Tubular aggregates in the crystal structure of <b>Mo6Se-2</b> .....                                             | 11 |
| <b>Fig. S6.</b> Pseudo layers in the crystal structure of <b>Mo6Se-2</b> .....                                                  | 12 |
| <b>Fig. S7.</b> The coloration of <b>Mo6Se-2</b> during XRPD experiment. ....                                                   | 13 |
| <b>Fig. S8.</b> <sup>77</sup> Se NMR spectrum of freshly prepared aqueous solution of <b>Mo6Se-2</b> .....                      | 14 |
| <b>Fig. S9.</b> <sup>77</sup> Se NMR spectrum of 22 hours aged aqueous solution of <b>Mo6Se-2</b> .....                         | 14 |
| <b>Fig. S10.</b> <sup>95</sup> Mo NMR spectrum of an aqueous solution of <b>Mo6Se-2</b> .....                                   | 15 |
| <b>Fig. S11.</b> 1D structures in the crystal structure of <b>Mo8-Na</b> .....                                                  | 16 |

**Table S1.** Experimental details

|                                                                            | <b>Mo6Se_1</b>                                                                                                                                                                           | <b>Mo6Se_2</b>                                                                        | <b>Mo8_Na</b>                                                                                                                                                                            |
|----------------------------------------------------------------------------|------------------------------------------------------------------------------------------------------------------------------------------------------------------------------------------|---------------------------------------------------------------------------------------|------------------------------------------------------------------------------------------------------------------------------------------------------------------------------------------|
| Chemical formula                                                           | $C_6H_{42.20}Mo_{12}NNa_{10}O_{77.60}Se_2$                                                                                                                                               | $C_6H_{16}Mo_{12}N_{0.50}Na_{10.50}O_{63.50}Se_2$                                     | $C_{50}H_{111}Mo_8N_5Na_2O_{29}$                                                                                                                                                         |
| $M_r$                                                                      | 2909.31                                                                                                                                                                                  | 2661.79                                                                               | 2059.93                                                                                                                                                                                  |
| Crystal system, space group                                                | Monoclinic, $P2_1/n$                                                                                                                                                                     | Triclinic, $P\bar{1}$                                                                 | Triclinic, $P\bar{1}$                                                                                                                                                                    |
| Temperature (K)                                                            | 130                                                                                                                                                                                      | 150                                                                                   | 130                                                                                                                                                                                      |
| $a, b, c$ (Å)                                                              | 16.6045 (2), 20.8678 (3), 19.2934 (3)                                                                                                                                                    | 10.5584 (9), 13.5966 (10), 20.6658 (16)                                               | 15.8296 (1), 18.5387 (1), 25.6801 (3)                                                                                                                                                    |
| $\alpha, \beta, \gamma$ (°)                                                | 90, 98.971 (1), 90                                                                                                                                                                       | 97.457 (3), 92.579 (3), 109.222 (3)                                                   | 89.128 (1), 88.474 (1), 89.873 (1)                                                                                                                                                       |
| $V$ (Å <sup>3</sup> )                                                      | 6603.37 (16)                                                                                                                                                                             | 2765.4 (4)                                                                            | 7532.53 (11)                                                                                                                                                                             |
| $Z$                                                                        | 4                                                                                                                                                                                        | 2                                                                                     | 4                                                                                                                                                                                        |
| $\mu$ (mm <sup>-1</sup> )                                                  | 3.51                                                                                                                                                                                     | 4.17                                                                                  | 1.38                                                                                                                                                                                     |
| Crystal size (mm)                                                          | 0.30 × 0.15 × 0.15                                                                                                                                                                       | 0.28 × 0.08 × 0.04                                                                    | 0.20 × 0.15 × 0.15                                                                                                                                                                       |
| Diffractometer                                                             | New Xcalibur, AtlasS2                                                                                                                                                                    | Bruker D8 Venture                                                                     | New Xcalibur, AtlasS2                                                                                                                                                                    |
| Absorption correction                                                      | Multi-scan <i>CrysAlis PRO</i> 1.171.38.41 (Rigaku Oxford Diffraction, 2015) Empirical absorption correction using spherical harmonics, implemented in SCALE3 ABSPACK scaling algorithm. | Multi-scan <i>SADABS</i> (Bruker-AXS, 2004)                                           | Multi-scan <i>CrysAlis PRO</i> 1.171.38.41 (Rigaku Oxford Diffraction, 2015) Empirical absorption correction using spherical harmonics, implemented in SCALE3 ABSPACK scaling algorithm. |
| $T_{min}, T_{max}$                                                         | 0.683, 1.000                                                                                                                                                                             | 0.619, 0.746                                                                          | 0.990, 1.000                                                                                                                                                                             |
| No. of measured, independent and observed [ $I > 2\sigma(I)$ ] reflections | 39479, 15700, 13311                                                                                                                                                                      | 90226, 15526, 12078                                                                   | 73588, 35149, 30375                                                                                                                                                                      |
| $R_{int}$                                                                  | 0.026                                                                                                                                                                                    | 0.101                                                                                 | 0.021                                                                                                                                                                                    |
| $\theta$ values (°)                                                        | $\theta_{max} = 29.4, \theta_{min} = 3.4$                                                                                                                                                | $\theta_{max} = 29.7, \theta_{min} = 1.6$                                             | $\theta_{max} = 29.6, \theta_{min} = 3.3$                                                                                                                                                |
| $(\sin \theta/\lambda)_{max}$ (Å <sup>-1</sup> )                           | 0.692                                                                                                                                                                                    | 0.696                                                                                 | 0.696                                                                                                                                                                                    |
| Range of $h, k, l$                                                         | -15 ≤ $h$ ≤ 22,<br>-28 ≤ $k$ ≤ 22,<br>-25 ≤ $l$ ≤ 25                                                                                                                                     | -14 ≤ $h$ ≤ 14,<br>-18 ≤ $k$ ≤ 18,<br>-28 ≤ $l$ ≤ 28                                  | -21 ≤ $h$ ≤ 19,<br>-22 ≤ $k$ ≤ 25,<br>-35 ≤ $l$ ≤ 32                                                                                                                                     |
| $R[F^2 > 2\sigma(F^2)], wR(F^2), S$                                        | 0.033, 0.083, 1.05                                                                                                                                                                       | 0.103, 0.225, 1.12                                                                    | 0.035, 0.080, 1.16                                                                                                                                                                       |
| No. of reflections, parameters, restraints                                 | 15700, 982, 0                                                                                                                                                                            | 15526, 848, 0                                                                         | 35149, 1693, 0                                                                                                                                                                           |
| H-atom treatment                                                           | H-atom parameters not defined                                                                                                                                                            | H-atom parameters not defined                                                         | H-atom parameters constrained                                                                                                                                                            |
|                                                                            | $w = 1/[\sigma^2(F_o^2) + (0.0293P)^2 + 34.3544P]$<br>where $P = (F_o^2 + 2F_c^2)/3$                                                                                                     | $w = 1/[\sigma^2(F_o^2) + (0.0197P)^2 + 229.1662P]$<br>where $P = (F_o^2 + 2F_c^2)/3$ | $w = 1/[\sigma^2(F_o^2) + (0.0223P)^2 + 16.945P]$<br>where $P = (F_o^2 + 2F_c^2)/3$                                                                                                      |

|                                                             |             |             |             |
|-------------------------------------------------------------|-------------|-------------|-------------|
| $\Delta\rho_{\max}, \Delta\rho_{\min}$ (e Å <sup>-3</sup> ) | 1.99, -1.11 | 2.69, -3.23 | 1.80, -0.82 |
|-------------------------------------------------------------|-------------|-------------|-------------|

Computer programs: *CrysAlis PRO* 1.171.38.41 (Rigaku OD, 2015), *APEX2* (Bruker-AXS, 2004), *SAINTE* (Bruker-AXS, 2004), *SHELXS2014* (Sheldrick, 2014), *SHELXL2014* (Sheldrick, 2014), *ShelXle* (Hübschle, 2011), *CIFTAB-2014* (Sheldrick, 2014).

**Table S2.** Selected geometric parameters (Å)

| <b>Mo6Se_1</b> |           |          |           |
|----------------|-----------|----------|-----------|
| O1—Mo1         | 1.697 (3) | O30—Mo7  | 1.717 (3) |
| O2—Mo1         | 2.340 (3) | O31—Mo12 | 1.695 (3) |
| O3—Mo1         | 1.935 (3) | O32—Mo12 | 1.710 (3) |
| O3—Mo6         | 1.933 (3) | O33—Mo11 | 1.932 (3) |
| O4—Mo1         | 1.712 (3) | O33—Mo12 | 1.936 (3) |
| O5—Mo1         | 1.899 (3) | O34—Mo11 | 2.296 (3) |
| O5—Mo2         | 1.901 (3) | O34—Mo12 | 2.305 (3) |
| O6—Mo2         | 2.305 (3) | O35—Mo11 | 1.710 (3) |
| O7—Mo2         | 1.703 (3) | O36—Mo11 | 1.700 (3) |
| O8—Mo2         | 1.920 (3) | O37—Mo10 | 1.723 (3) |
| O8—Mo3         | 1.926 (3) | O38—Mo10 | 1.693 (3) |
| O9—Mo3         | 1.699 (3) | O39—Mo9  | 1.917 (3) |
| O10—Mo3        | 1.709 (3) | O39—Mo10 | 1.932 (3) |
| O11—Mo3        | 1.897 (3) | O41—Mo9  | 1.695 (3) |
| O11—Mo4        | 1.892 (3) | O42—Mo10 | 2.308 (3) |
| O12—Mo2        | 2.299 (3) | O43—Mo8  | 1.909 (3) |
| O12—Mo3        | 2.325 (3) | O43—Mo9  | 1.916 (3) |
| O13—Mo4        | 1.714 (3) | O44—Mo9  | 2.320 (3) |
| O14—Mo4        | 1.706 (3) | O44—Mo10 | 2.300 (3) |
| O15—Mo4        | 2.309 (3) | O45—Mo10 | 1.900 (3) |
| O15—Mo5        | 2.306 (3) | O45—Mo11 | 1.900 (3) |
| O16—Mo1        | 2.278 (3) | O46—Mo9  | 1.715 (3) |
| O16—Mo6        | 2.361 (3) | O47—Mo8  | 1.713 (3) |
| O17—Mo4        | 2.308 (3) | O48—Mo8  | 2.343 (3) |
| O18—Mo4        | 1.928 (3) | O49—Mo7  | 2.283 (3) |
| O18—Mo5        | 1.933 (3) | O50—Mo9  | 2.333 (3) |
| O19—Mo5        | 1.708 (3) | O51—Mo8  | 1.702 (3) |
| O20—Mo5        | 1.704 (3) | O52—Mo7  | 1.939 (3) |
| O21—Mo5        | 2.267 (3) | O52—Mo8  | 1.920 (3) |
| O22—Mo5        | 1.901 (3) | O53—Mo7  | 2.314 (3) |
| O22—Mo6        | 1.913 (3) | O53—Mo8  | 2.315 (3) |
| O23—Mo6        | 1.715 (3) | O54—Mo3  | 2.351 (3) |
| O24—Mo6        | 1.692 (3) | O55—Mo2  | 1.713 (3) |
| O25—Mo6        | 2.261 (3) | O12—Se2  | 1.698 (3) |
| O26—Mo12       | 2.291 (3) | O15—Se2  | 1.695 (3) |
| O27—Mo11       | 2.289 (3) | O16—Se2  | 1.698 (3) |
| O28—Mo7        | 1.698 (3) | O34—Se1  | 1.694 (3) |
| O29—Mo7        | 1.902 (3) | O44—Se1  | 1.701 (3) |
| O29—Mo12       | 1.907 (3) | O53—Se1  | 1.699 (3) |

| <b>Mo6Se_2</b> |            |          |            |
|----------------|------------|----------|------------|
| O1—Mo1         | 1.703 (13) | O32—Mo7  | 2.271 (11) |
| O2—Mo1         | 2.307 (11) | O33—Mo10 | 2.318 (10) |
| O3—Mo1         | 1.884 (12) | O34—Mo11 | 2.315 (11) |
| O3—Mo6         | 1.920 (13) | O35—Mo12 | 2.307 (11) |
| O4—Mo2         | 2.321 (11) | O36—Mo11 | 1.697 (12) |
| O5—Mo1         | 2.310 (12) | O37—Mo10 | 1.925 (11) |
| O5—Mo2         | 2.294 (12) | O37—Mo11 | 1.936 (11) |
| O6—Mo1         | 1.944 (12) | O38—Mo11 | 1.900 (12) |
| O6—Mo2         | 1.933 (12) | O38—Mo12 | 1.921 (11) |
| O7—Mo1         | 1.706 (11) | O39—Mo11 | 1.690 (12) |
| O8—Mo2         | 1.894 (12) | O40—Mo12 | 1.707 (12) |
| O8—Mo3         | 1.894 (11) | O41—Mo12 | 1.705 (12) |
| O9—Mo2         | 1.719 (12) | O42—Mo7  | 1.952 (12) |
| O10—Mo2        | 1.701 (12) | O42—Mo12 | 1.895 (12) |
| O12—Mo3        | 1.699 (13) | O43—Mo10 | 2.387 (11) |
| O13—Mo3        | 1.709 (12) | O43—Mo11 | 2.287 (12) |
| O14—Mo3        | 1.924 (13) | O44—Mo10 | 1.705 (13) |
| O14—Mo4        | 1.910 (14) | O45—Mo9  | 1.907 (11) |
| O15—Mo3        | 2.269 (11) | O45—Mo10 | 1.899 (11) |
| O15—Mo4        | 2.313 (11) | O46—Mo9  | 1.699 (12) |
| O16—Mo4        | 1.723 (13) | O47—Mo7  | 2.283 (12) |
| O17—Mo4        | 1.686 (15) | O47—Mo12 | 2.294 (11) |
| O18—Mo3        | 2.355 (12) | O48—Mo7  | 1.909 (13) |
| O19—Mo4        | 2.252 (11) | O48—Mo8  | 1.905 (13) |
| O20—Mo4        | 1.928 (12) | O49—Mo7  | 1.734 (13) |
| O20—Mo5        | 1.879 (12) | O50—Mo7  | 1.703 (12) |
| O21—Mo5        | 1.716 (12) | O51—Mo8  | 1.708 (13) |
| O22—Mo5        | 1.676 (13) | O52—Mo8  | 1.908 (14) |
| O23—Mo5        | 2.292 (12) | O52—Mo9  | 1.933 (14) |
| O23—Mo6        | 2.295 (11) | O53—Mo8  | 2.318 (12) |
| O24—Mo5        | 1.964 (14) | O53—Mo9  | 2.323 (12) |
| O24—Mo6        | 1.905 (13) | O54—Mo9  | 1.710 (13) |
| O25—Mo5        | 2.275 (12) | O55—Mo10 | 1.711 (12) |
| O26—Mo6        | 1.702 (12) | O5—Se1   | 1.695 (12) |
| O27—Mo6        | 2.293 (11) | O15—Se1  | 1.701 (11) |
| O28—Mo9        | 2.289 (11) | O23—Se1  | 1.693 (11) |
| O29—Mo8        | 2.289 (11) | O43—Se2  | 1.686 (11) |
| O30—Mo8        | 1.693 (14) | O47—Se2  | 1.696 (11) |
| O31—Mo6        | 1.699 (13) | O53—Se2  | 1.675 (12) |

| <b>Mo8_Na</b>         |           |                         |           |
|-----------------------|-----------|-------------------------|-----------|
| O1—Mo1                | 1.752 (2) | O35—Mo9                 | 1.922 (2) |
| O1—Mo3 <sup>i</sup>   | 2.256 (2) | O35—Mo10                | 1.897 (2) |
| O2—Mo1                | 1.951 (2) | O36—Mo9 <sup>iii</sup>  | 2.247 (3) |
| O2—Mo2                | 2.006 (2) | O36—Mo12                | 1.752 (2) |
| O2—Mo4 <sup>i</sup>   | 2.289 (2) | O37—Mo11                | 1.713 (3) |
| O3—Mo2                | 1.688 (2) | O38—Mo9                 | 1.726 (3) |
| O4—Mo2                | 1.898 (2) | O39—Mo9                 | 1.694 (3) |
| O4—Mo3                | 1.915 (2) | O43—Mo16                | 1.716 (3) |
| O5—Mo2                | 1.715 (2) | O44—Mo13                | 1.917 (2) |
| O6—Mo1                | 2.152 (2) | O44—Mo16                | 1.903 (2) |
| O6—Mo1 <sup>i</sup>   | 2.317 (2) | O45—Mo13                | 1.724 (2) |
| O6—Mo2                | 2.349 (2) | O46—Mo13                | 1.698 (2) |
| O6—Mo3                | 2.441 (2) | O47—Mo13                | 1.925 (2) |
| O6—Mo4                | 2.305 (2) | O47—Mo14                | 1.902 (2) |
| O7—Mo1                | 1.701 (2) | O48—Mo14                | 1.714 (3) |
| O8—Mo1                | 1.952 (2) | O49—Mo16                | 1.681 (3) |
| O8—Mo2 <sup>i</sup>   | 2.301 (2) | O50—Mo14 <sup>iv</sup>  | 2.277 (2) |
| O8—Mo4                | 2.011 (2) | O50—Mo15                | 1.950 (2) |
| O9—Mo4                | 1.693 (2) | O50—Mo16                | 2.018 (2) |
| O10—Mo4               | 1.717 (3) | O51—Mo15                | 1.696 (2) |
| O11—Mo3               | 1.928 (2) | O52—Mo13 <sup>iv</sup>  | 2.244 (2) |
| O11—Mo4               | 1.899 (2) | O52—Mo15                | 1.755 (2) |
| O12—Mo3               | 1.723 (2) | O53—Mo14                | 2.016 (2) |
| O13—Mo3               | 1.697 (2) | O53—Mo15                | 1.954 (2) |
| O17—Mo5               | 1.721 (2) | O53—Mo16 <sup>iv</sup>  | 2.285 (2) |
| O18—Mo6               | 1.715 (2) | O54—Mo14                | 1.686 (3) |
| O19—Mo7               | 1.718 (2) | O55—Mo13                | 2.445 (2) |
| O20—Mo8               | 1.703 (2) | O55—Mo14                | 2.313 (2) |
| O21—Mo7               | 1.692 (2) | O55—Mo15                | 2.147 (2) |
| O22—Mo6 <sup>ii</sup> | 2.311 (2) | O55—Mo15 <sup>iv</sup>  | 2.308 (2) |
| O22—Mo7               | 2.015 (2) | O55—Mo16                | 2.354 (2) |
| O22—Mo8               | 1.954 (2) | O56—Mo10                | 2.012 (2) |
| O23—Mo5 <sup>ii</sup> | 2.262 (2) | O56—Mo11 <sup>iii</sup> | 2.294 (2) |
| O23—Mo8               | 1.752 (2) | O56—Mo12                | 1.959 (2) |
| O24—Mo6               | 2.011 (2) | O57—Mo10                | 1.717 (2) |
| O24—Mo7 <sup>ii</sup> | 2.306 (2) | O58—Mo12                | 1.700 (3) |
| O24—Mo8               | 1.955 (2) | O5—Na2                  | 2.373 (3) |
| O25—Mo5               | 2.427 (2) | O7—Na2                  | 2.430 (3) |
| O25—Mo6               | 2.339 (2) | O10—Na2                 | 2.409 (3) |

|                         |           |         |           |
|-------------------------|-----------|---------|-----------|
| O25—Mo7                 | 2.345 (2) | O12—Na2 | 2.425 (3) |
| O25—Mo8                 | 2.133 (2) | O14—Na2 | 2.479 (3) |
| O25—Mo8 <sup>ii</sup>   | 2.331 (2) | O15—Na1 | 2.466 (3) |
| O26—Mo5                 | 1.924 (2) | O15—Na2 | 2.401 (3) |
| O26—Mo7                 | 1.894 (2) | O16—Na1 | 2.385 (3) |
| O27—Mo5                 | 1.692 (2) | O17—Na1 | 2.365 (3) |
| O28—Mo5                 | 1.929 (3) | O18—Na1 | 2.408 (3) |
| O28—Mo6                 | 1.898 (2) | O19—Na1 | 2.382 (3) |
| O29—Mo6                 | 1.691 (3) | O20—Na1 | 2.467 (3) |
| O30—Mo10                | 1.699 (2) | O37—Na4 | 2.403 (3) |
| O31—Mo9                 | 1.932 (2) | O38—Na4 | 2.367 (3) |
| O31—Mo11                | 1.894 (2) | O40—Na4 | 2.363 (3) |
| O32—Mo10 <sup>iii</sup> | 2.296 (2) | O41—Na3 | 2.431 (3) |
| O32—Mo11                | 2.018 (2) | O41—Na4 | 2.482 (3) |
| O32—Mo12                | 1.958 (2) | O42—Na3 | 2.406 (3) |
| O33—Mo11                | 1.701 (2) | O43—Na3 | 2.380 (3) |
| O34—Mo9                 | 2.447 (2) | O45—Na3 | 2.388 (3) |
| O34—Mo10                | 2.351 (2) | O48—Na3 | 2.403 (3) |
| O34—Mo11                | 2.346 (2) | O51—Na3 | 2.426 (3) |
| O34—Mo12                | 2.119 (2) | O57—Na4 | 2.377 (3) |
| O34—Mo12 <sup>iii</sup> | 2.322 (2) | O58—Na4 | 2.463 (3) |

Symmetry code(s): (i)  $-x+1, -y+2, -z+2$ ; (ii)  $-x+1, -y+2, -z+1$ ; (iii)  $-x, -y+1, -z+1$ ; (iv)  $-x, -y+1, -z$ .

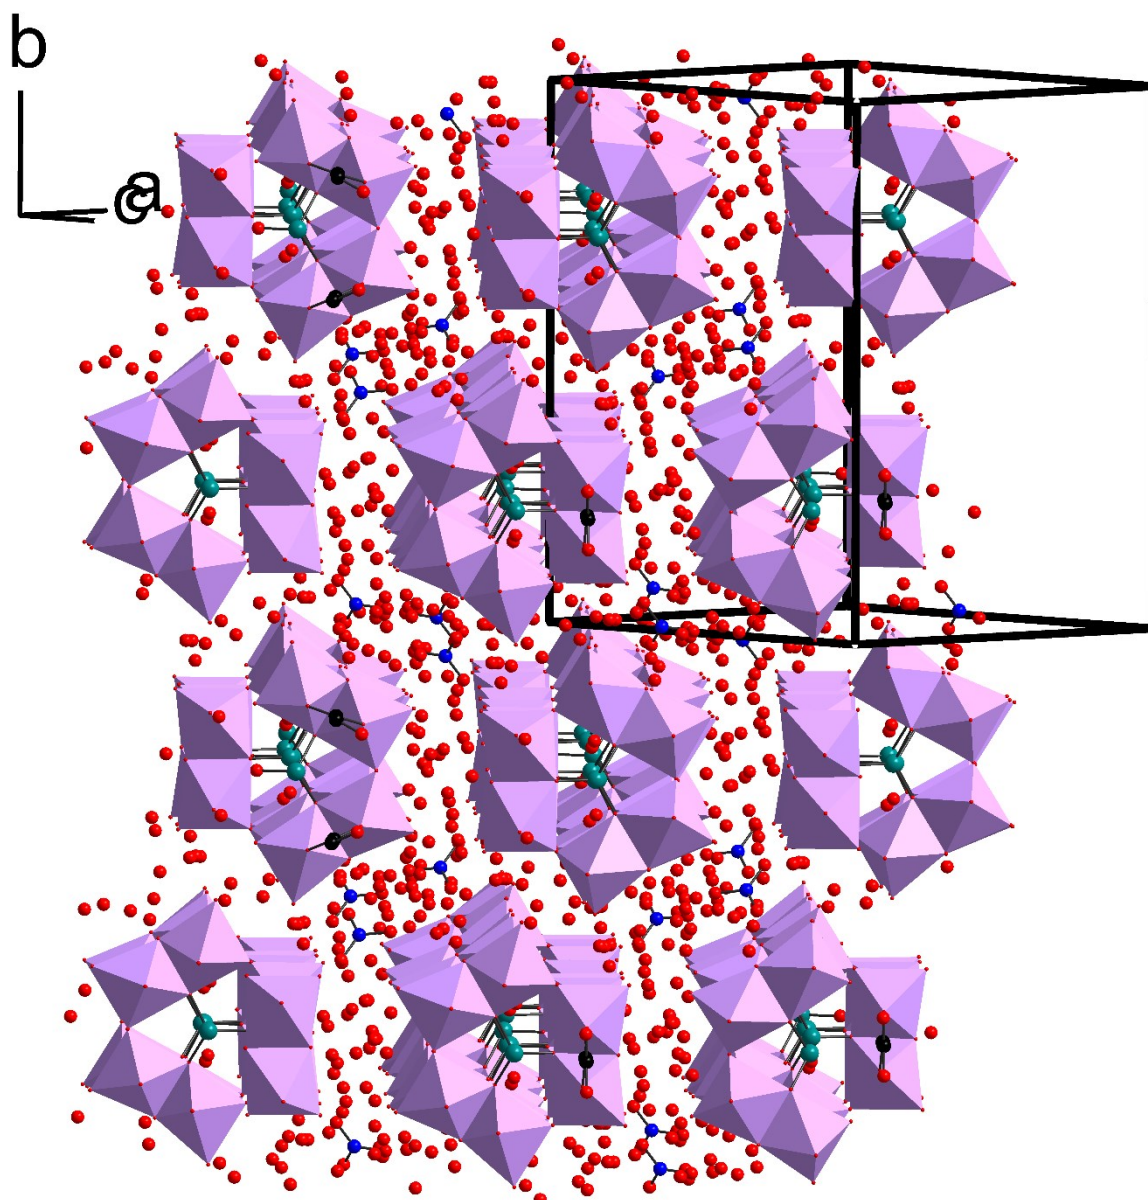

Fig. S1. The infinite tubular structures along [10-1] crystal direction in the crystal structure of Mo6Se-1.



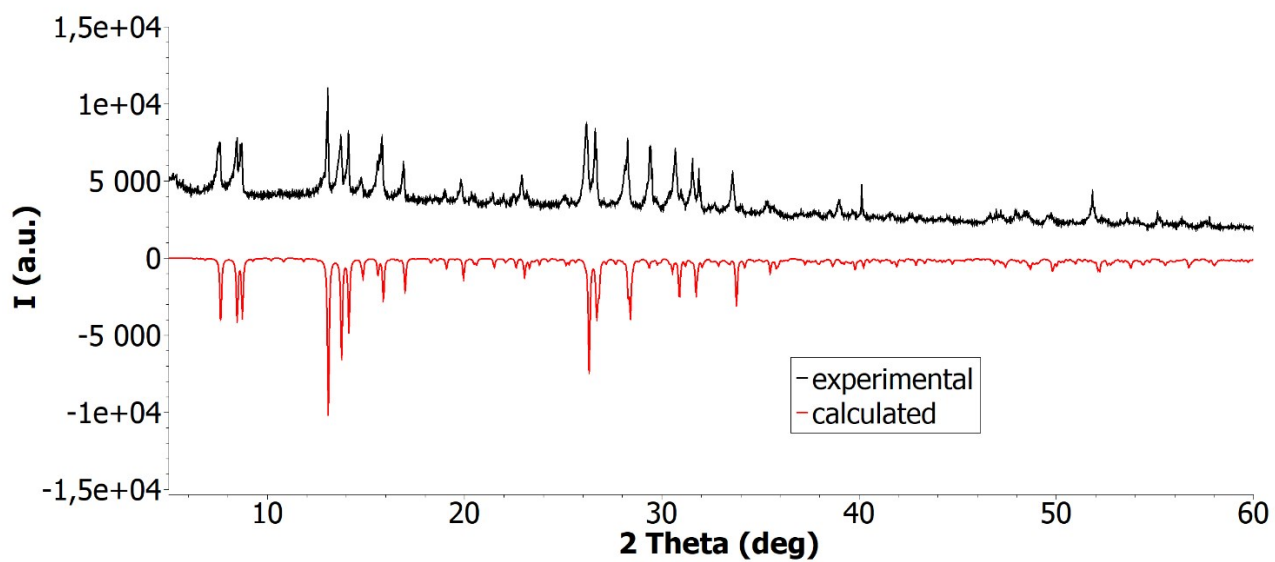

Fig. S2. Comparison of experimental and calculated powder patterns for Mo<sub>6</sub>Se-1.

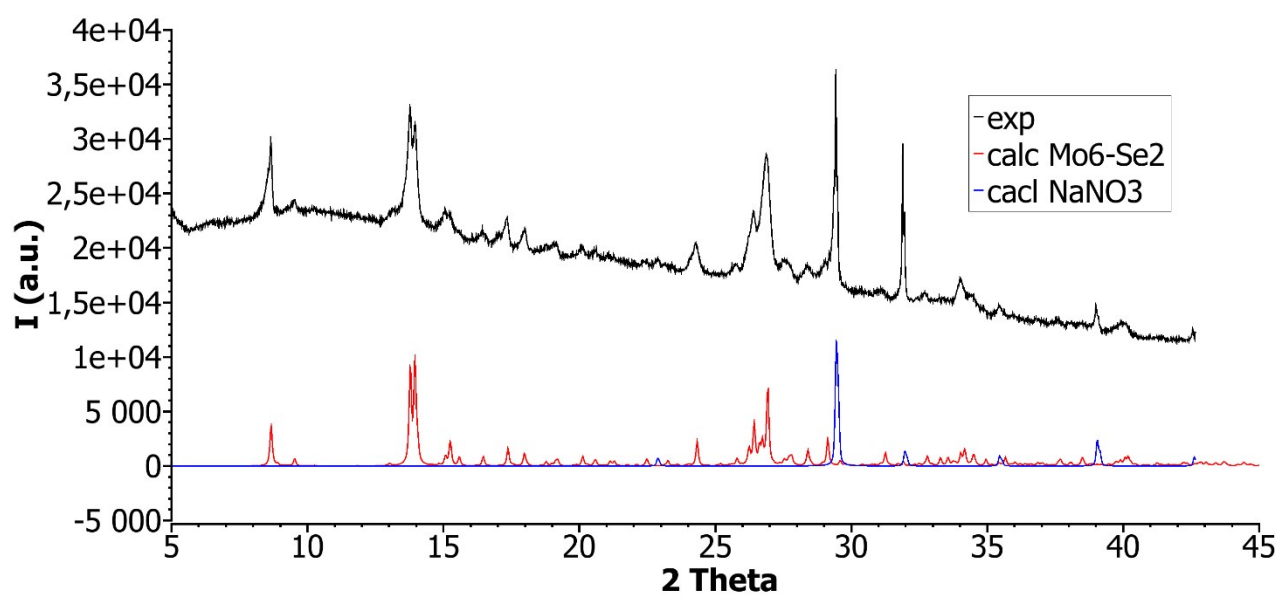

Fig. S3. XRPD patterns comparison for Mo<sub>6</sub>Se-2.

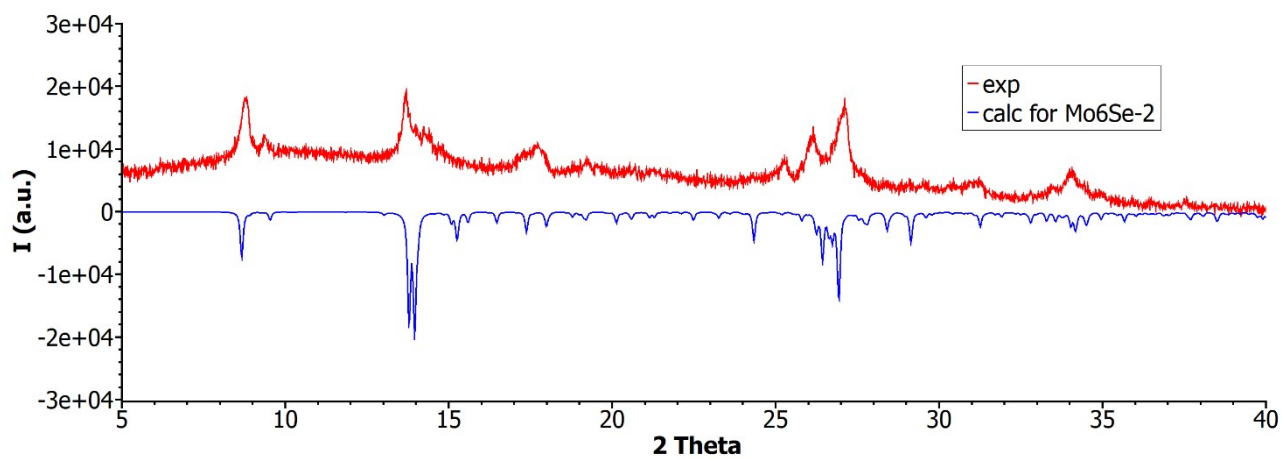

Fig. S4. XRPD patterns comparison for Mo<sub>6</sub>Se-2 after MeOH washing.

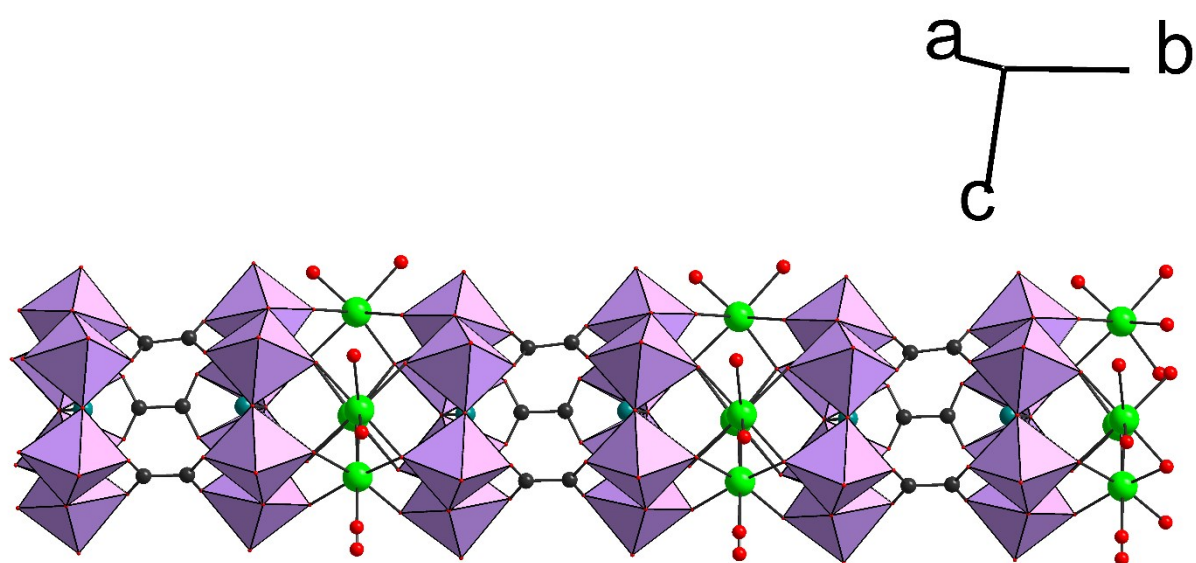

Fig. S5. Tubular aggregates in the crystal structure of Mo<sub>6</sub>Se-2.

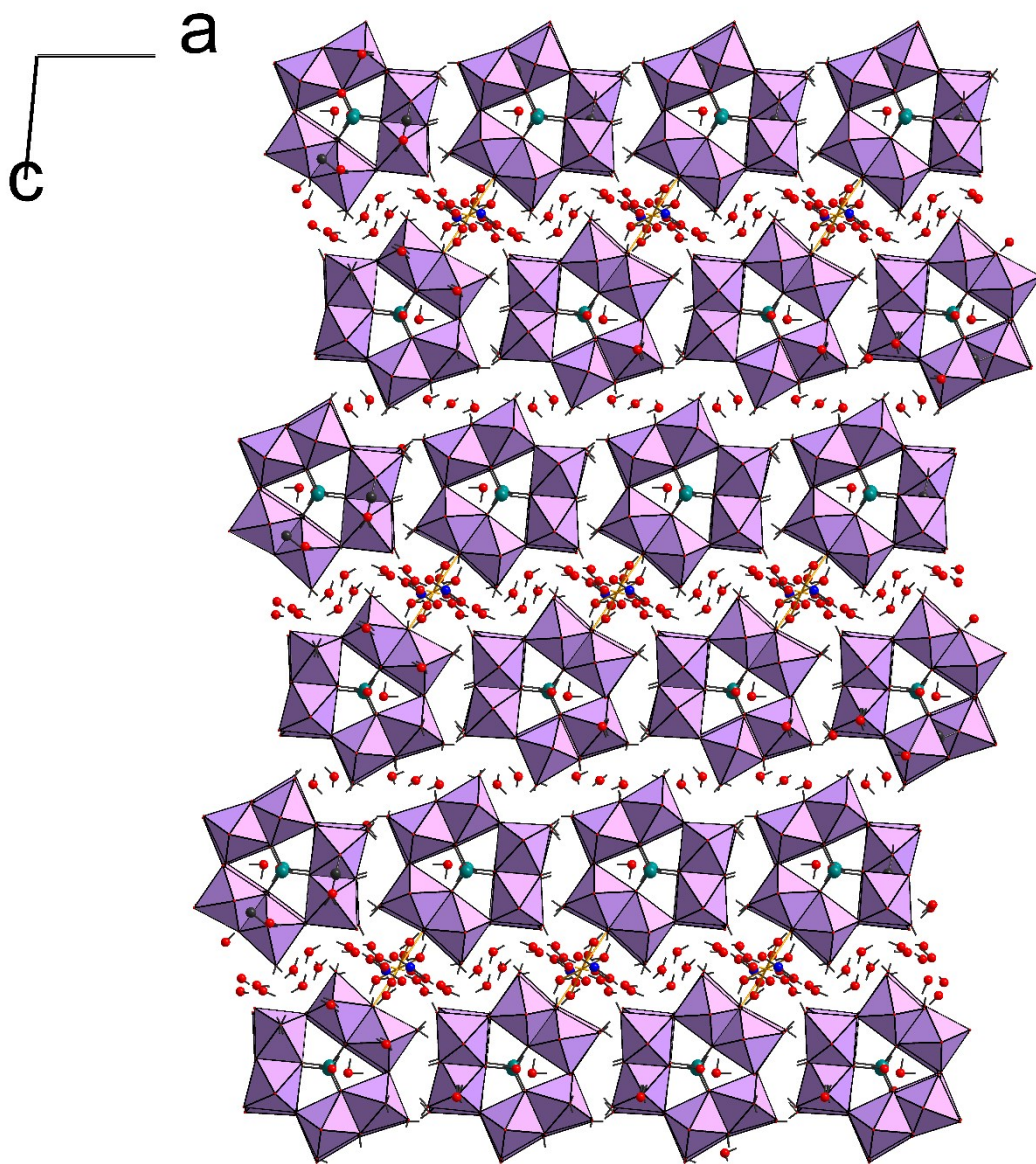

Fig. S6. Pseudo layers in the crystal structure of Mo<sub>6</sub>Se-2.

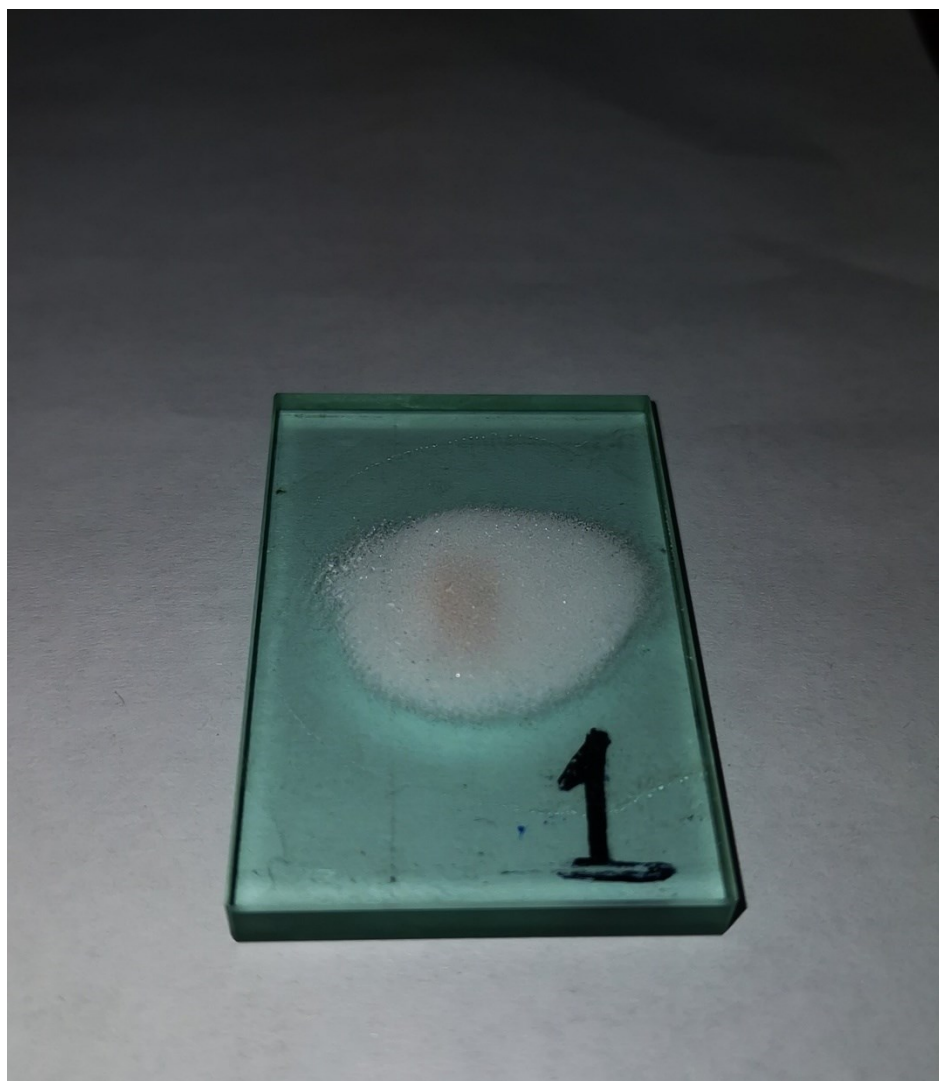

Fig. S7. The coloration of  $\text{Mo}_6\text{Se}_2$  during XRPD experiment.

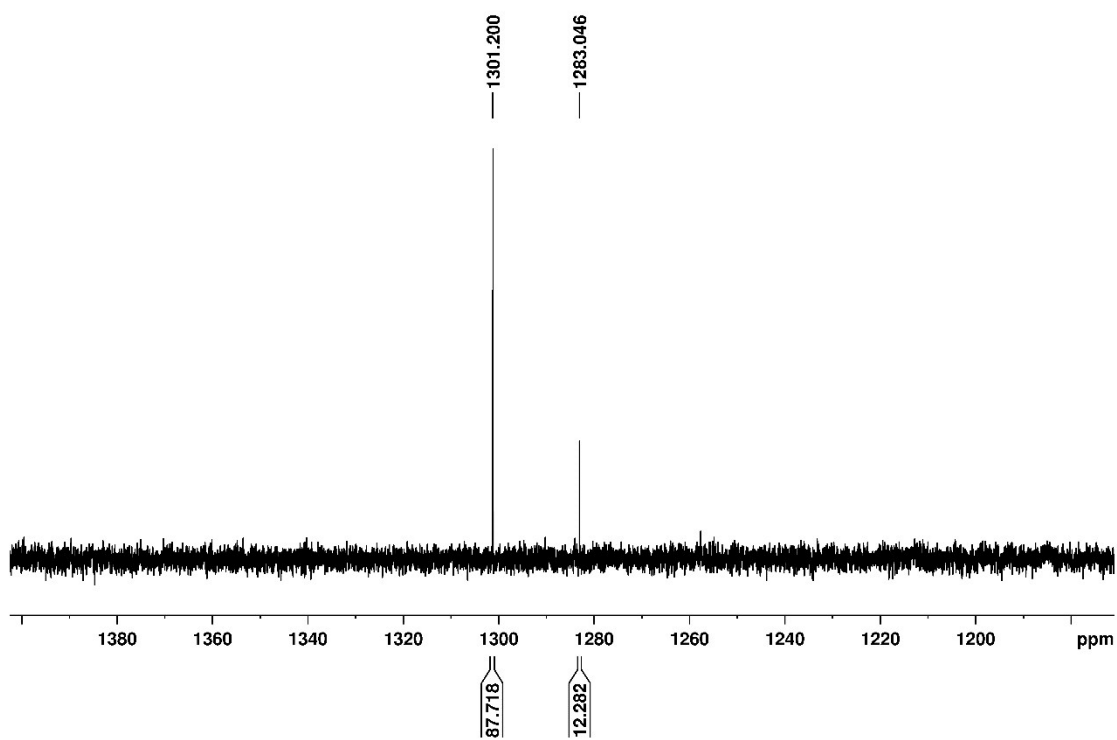

Fig. S8.  $^{77}\text{Se}$  NMR spectrum of freshly prepared aqueous solution of  $\text{Mo}_6\text{Se}_2$ .

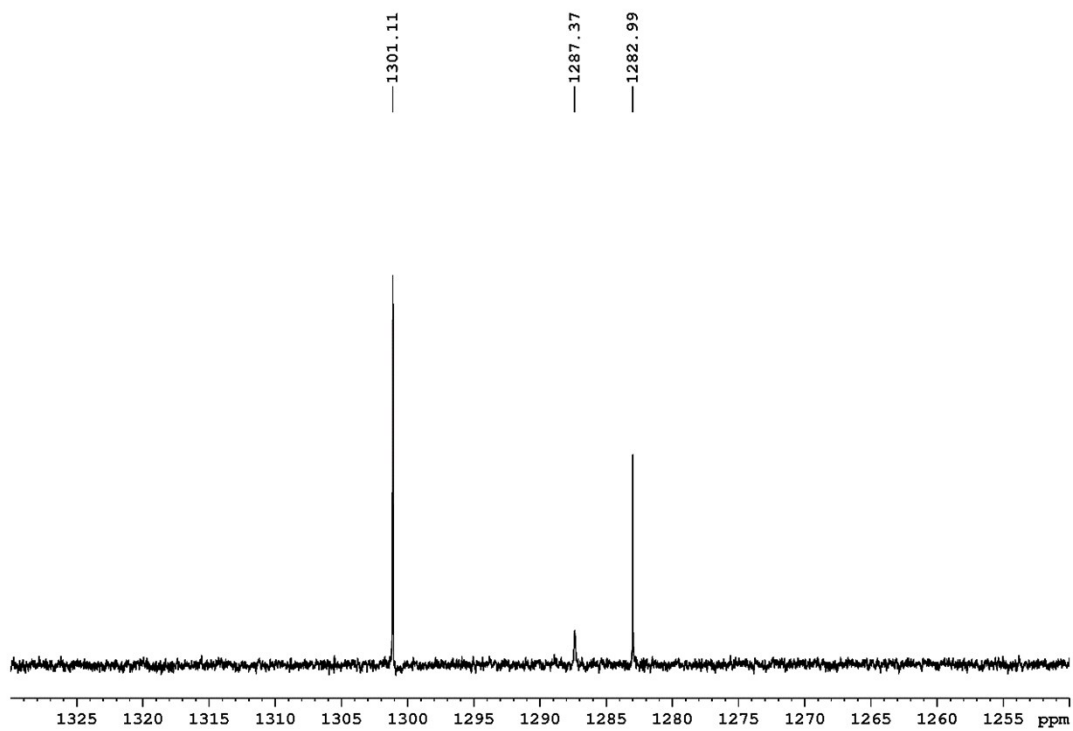

Fig. S9.  $^{77}\text{Se}$  NMR spectrum of 22 hours aged aqueous solution of  $\text{Mo}_6\text{Se}_2$ .

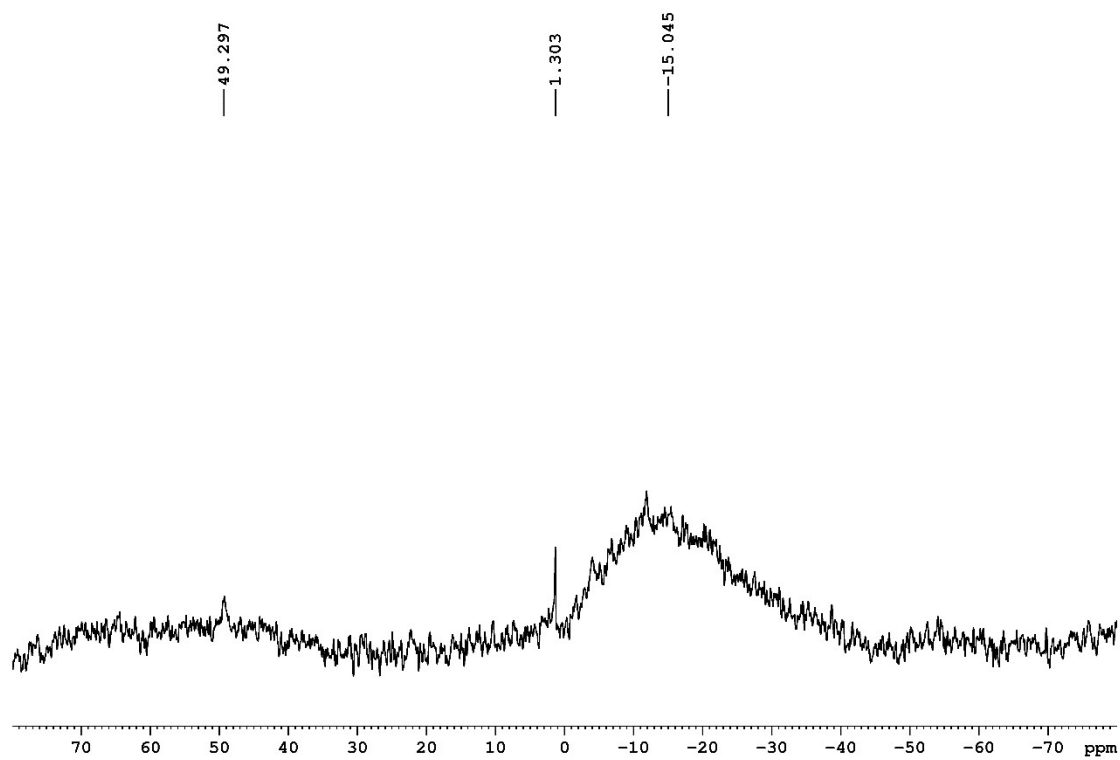

Fig. S10.  $^{95}\text{Mo}$  NMR spectrum of an aqueous solution of  $\text{Mo}_6\text{Se}_2$ .



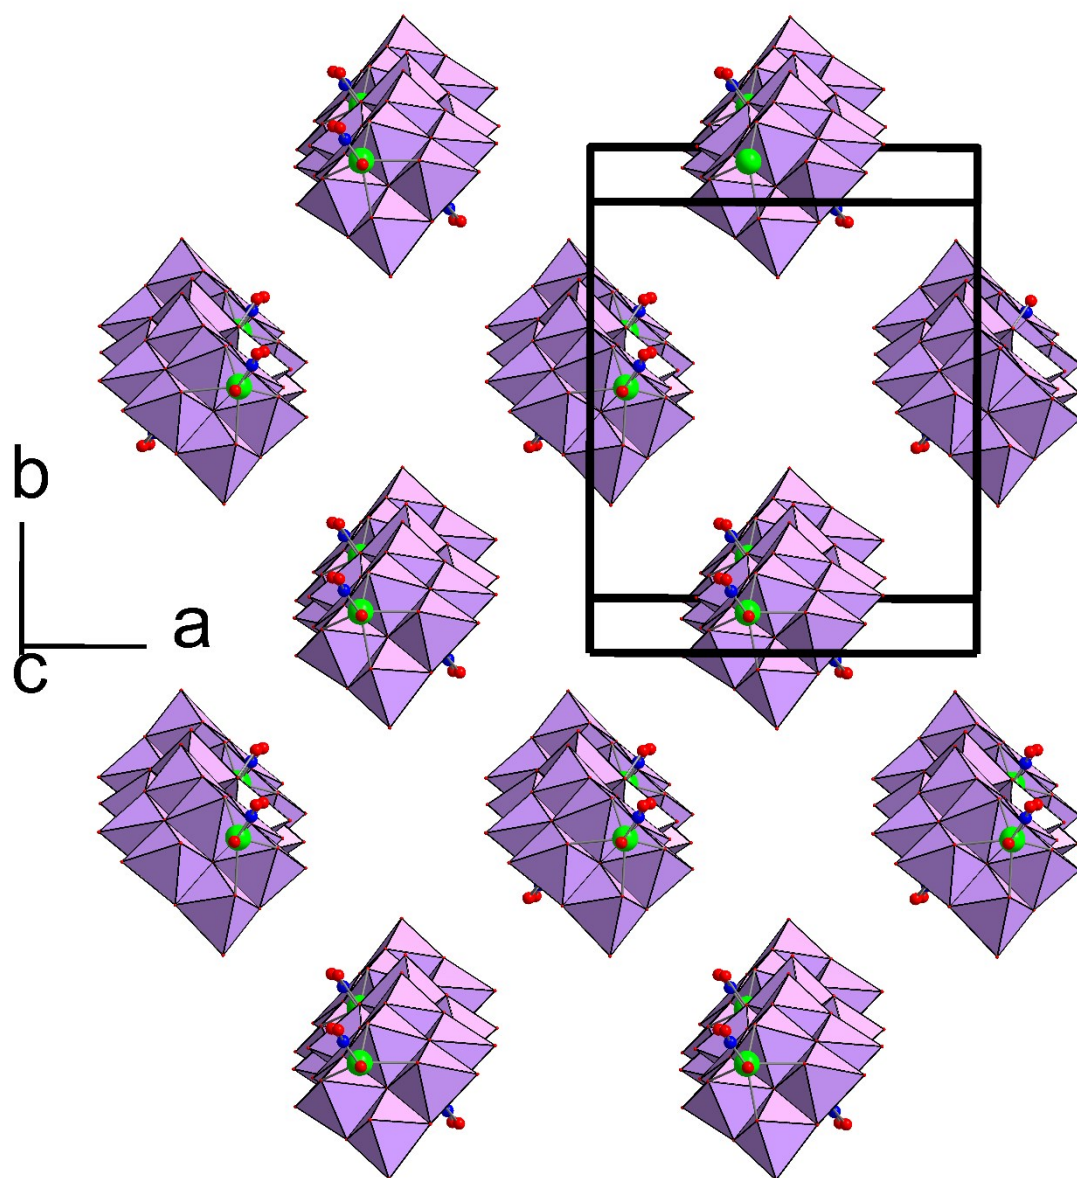

Fig. S11. 1D structures in the crystal structure of Mo<sub>8</sub>-Na.
